# Supplementary material for: Development of global temperature and pH calibrations based on bacterial 3-hydroxy fatty acids in soils
Source: Copernicus journal article supplement (doi:10.5194/bg-18-3937-2021), 2021-07-01
Supplement: Supplementary file 1 [file 4_Supplementary tables.xlsx]

## Sheet: Table 1. 3-OH FAs
Sup. Table 1.	Relative abundances (%) of the normal, iso and anteiso 3-OH FAs in soils from the Peruvian Andes, Chilean Andes, Mts Pollino and Shegyla.
Samples	Localisation	nC10	iC11	aC11	nC11	iC12	nC12	iC13	aC13	nC13	iC14	nC14	iC15	aC15	nC15	iC16	nC16	iC17	aC17	nC17	nC18
1	Peruvian Andes	2.10937	0.751286	0.0574762	0.22308	0.150548	7.63813	3.16045	0.305444	0.556569	1.22245	23.1387	7.02148	2.08646	0.851135	0.835876	20.6034	8.76092	1.06628	1.10859	18.3524
2	Peruvian Andes	1.05874	0.278511	0.0418763	0.112496	0.0222777	5.17909	1.23486	0.0984358	0.561103	0.918008	24.8788	9.17227	1.5909	0.620437	0.471422	18.2662	5.83991	0.587082	0.965257	28.1024
3	Peruvian Andes	1.38603	0.39883	0.0539874	0.0925525	0.0308631	4.80017	1.21322	0.175433	0.467064	1.17449	25.1388	9.35528	2.04649	0.59188	0.539057	20.1348	6.79975	0.639633	0.913539	24.0482
4	Peruvian Andes	1.98363	0.484203	0.0505269	0.148653	0.0556874	6.35821	1.66728	0.239764	0.527786	1.23479	24.9817	7.92298	2.55508	0.61523	0.576692	20.3043	7.73417	0.946257	1.01566	20.5974
5	Peruvian Andes	1.60187	0.182719	0.0243864	0.110242	0.034738	5.99349	1.38184	0.120721	0.514756	1.0277	26.1414	7.7771	2.79963	0.527916	0.630196	17.8829	8.43559	1.22268	0.926205	22.6639
6	Peruvian Andes	1.27176	0.162079	0.0264615	0.109608	0.020685	5.41513	0.900078	0.0294056	0.444444	1.04631	24.7972	8.05909	2.95974	0.434558	0.541928	17.8096	7.44776	1.0711	0.867561	26.5855
7	Peruvian Andes	1.26155	0.159995	0.0134415	0.078524	0.0309268	5.14905	0.879092	0.839235	0.38241	1.07707	24.8804	7.67994	3.29127	0.469996	0.597595	16.4937	6.86073	0.95912	0.803936	28.092
8	Peruvian Andes	1.60137	0.112903	0.0383747	0.114512	0.0322397	6.11417	1.18645	0.179711	0.397657	1.10693	24.6775	7.83468	3.89652	0.463776	0.558206	16.8885	6.7816	1.14298	0.717291	26.1546
9	Peruvian Andes	1.31895	0.0809168	0.0279304	0.114592	0.0193348	6.34534	1.11999	0.1787	0.435198	1.17729	23.8769	8.10951	3.86523	0.45898	0.553586	15.633	8.07013	1.47352	0.852387	26.2885
10	Peruvian Andes	0.97363	0.120993	0.031017	0.0876636	0.00956911	6.94006	1.41877	0.193227	0.421932	1.33881	23.5132	8.81497	4.67042	0.339022	0.673406	15.5349	7.53043	1.65169	0.748543	24.9877
11	Peruvian Andes	1.66901	0.178063	0.0316154	0.0973844	0.0360722	7.61061	1.73848	0.256741	0.451244	1.56465	23.1215	9.16897	4.02879	0.583186	0.944421	15.8856	9.669	2.13081	0.906531	19.9274
12	Peruvian Andes	1.45299	0.206749	0.0181789	0.103674	0.0296497	7.64602	1.05567	0.212612	0.445739	1.11916	23.3136	7.98493	3.43221	0.3874	0.600897	16.7339	7.0646	1.59221	0.912597	25.6872
13	Peruvian Andes	1.26454	0.152958	0.0157713	0.11575	0.0416102	7.63714	1.55525	0.267019	0.473856	1.60624	22.3717	8.70673	4.45751	0.48962	0.824608	15.3288	8.8081	2.09395	0.875702	22.9131
14	Peruvian Andes	4.70507	0.0591234	0.0256985	0.228399	0.0314028	7.77041	0.993026	0.115165	0.442369	1.06199	22.2622	4.9839	4.36902	0.489263	0.409979	12.0849	3.9401	1.69918	0.83577	33.493
15	Mt. Shegyla, Tibet	6.19838	0.360914	0.0484456	0.333386	0.0934936	10.1562	2.26657	0.467313	0.579447	1.34801	21.2908	5.21696	3.80884	0.61232	0.852369	16.9017	7.38621	1.60154	0.791964	19.6851
16	Mt. Shegyla, Tibet	2.83376	0.430208	0.0648351	0.215913	0.162784	9.96833	3.48494	0.711218	0.733429	1.61868	20.7002	5.52856	3.92031	0.877619	1.35668	17.7881	11.2652	1.9983	1.07442	15.2665
17	Mt. Shegyla, Tibet	2.88792	0.309996	0.0428858	0.29643	0.115138	9.94673	3.08148	0.563363	0.851709	1.43223	23.6718	5.41497	3.72474	0.914941	1.2419	17.8691	9.14022	1.91071	1.10957	15.4742
18	Mt. Shegyla, Tibet	3.6153	0.339508	0.0834004	0.297016	0.128797	9.64317	3.21419	0.580222	0.655932	1.59324	21.7913	6.76378	4.02541	0.74591	1.48434	17.3301	10.2751	2.8257	1.01088	13.5967
19	Mt. Shegyla, Tibet	2.14818	0.185972	0.077522	0.333315	0.213933	7.9893	2.82869	0.583215	0.802767	1.66314	19.6125	9.12069	3.75104	0.917101	1.80507	18.2438	13.5773	3.23458	1.19302	11.7188
20	Mt. Shegyla, Tibet	3.39413	0.250384	0.0551135	0.382756	0.174574	8.4674	3.0197	0.511784	0.693926	1.78664	20.0936	9.00323	3.69389	0.953603	1.79088	17.2048	12.5308	2.95776	1.38422	11.6508
21	Mt. Shegyla, Tibet	3.69258	0.346879	0.0511286	0.237429	0.0652723	12.7972	2.27249	0.412271	0.536063	1.72542	23.4489	6.95348	3.79794	0.462837	0.963634	15.9623	8.19526	2.11325	0.581077	15.3846
22	Mt. Shegyla, Tibet	3.51153	0.298063	0.0434228	0.288579	0.0773786	12.2869	1.92097	0.488587	0.574754	1.44104	22.9605	6.64565	3.77669	0.451432	0.944547	16.766	6.60078	2.08474	0.694874	18.1436
23	Mt. Shegyla, Tibet	3.89402	0.205144	0.0414963	0.209509	0.0581285	13.4678	2.26304	0.343984	0.559229	1.75391	22.3828	6.97635	3.89998	0.436458	1.00922	18.1895	6.02629	1.52394	0.616599	16.1426
24	Mt. Shegyla, Tibet	3.88747	0.201475	0.0538034	0.213348	0.072394	13.0264	2.42221	0.35087	0.608677	1.83404	21.8423	6.93327	3.90767	0.401122	0.988261	18.5489	6.37996	1.61236	0.700905	16.0145
25	Mt. Shegyla, Tibet	4.11517	0.217459	0.049548	0.202836	0.0433083	12.9989	1.94322	0.247263	0.506788	1.55338	21.1055	6.42036	3.44114	0.397005	0.951159	19.4352	5.50271	1.3613	0.757881	18.75
26	Mt. Shegyla, Tibet	3.10671	0.114088	0.043519	0.214208	0.0620684	12.8375	2.37896	0.378575	0.668865	1.92676	23.4365	7.11749	4.71625	0.471855	0.71638	15.0266	4.8883	1.58174	0.568525	19.745
27	Mt. Shegyla, Tibet	3.0988	0.115827	0.0554312	0.264836	0.0500386	12.7469	2.46929	0.454807	0.661862	1.96516	22.6566	6.19697	4.91115	0.403682	0.664174	15.7419	5.39193	1.63109	0.418492	20.1011
28	Mt. Shegyla, Tibet	3.65286	0.217032	0.0477107	0.257263	0.0631184	12.955	2.54595	0.400252	0.70667	2.09108	23.6252	6.75214	4.5575	0.451236	0.7792	15.4086	6.54551	1.94692	0.608712	16.3881
29	Mt. Shegyla, Tibet	4.01261	0.188449	0.0645032	0.272951	0.0581059	12.1635	2.08636	0.431964	0.69278	1.78007	22.1817	4.91358	5.0067	0.495273	0.855222	16.8067	5.95448	1.98783	0.580569	19.4666
30	Mt. Shegyla, Tibet	4.22028	0.170507	0.0605228	0.357217	0.0601409	12.218	2.19206	0.293562	1.24525	1.925	21.3001	5.74595	4.44025	0.777115	0.872384	16.0794	5.946	2.28642	0.761272	19.0486
31	Mt. Shegyla, Tibet	3.47887	0.22118	0.0569801	0.307718	0.0566205	12.0812	2.40438	0.32796	0.707139	2.25139	22.7895	6.35079	4.70253	0.597139	0.794479	16.5458	8.26987	2.25547	0.61813	15.1829
32	Mt. Pollino, Italy	1.96696	0.596677	0.0541817	0.184896	0.237481	8.73899	3.98605	0.613242	0.546177	1.61686	17.2261	8.629	2.55466	0.944302	2.16601	15.4504	18.7909	2.32339	1.9484	11.4254
33	Mt. Pollino, Italy	3.21545	0.574226	0.0915252	0.168496	0.237125	9.28951	4.16396	0.868985	1.33673	1.79241	17.2108	5.18774	3.45705	1.43207	2.22829	18.1268	12.8051	2.09882	1.63555	14.0793
34	Mt. Pollino, Italy	3.96669	0.856051	0.0644539	0.157747	0.298253	10.0367	3.64581	0.770349	0.558895	1.2909	19.0377	6.9483	2.70813	0.635621	2.0304	16.6367	16.1884	2.66492	1.16332	10.3407
35	Mt. Pollino, Italy	4.42586	0.708778	0.0719407	0.123009	0.249637	9.11693	3.44846	0.641515	0.450666	1.30434	17.8031	6.58043	2.94675	0.709693	2.19262	16.2146	16.2018	3.01047	1.27305	12.5263
36	Mt. Pollino, Italy	4.32998	0.692877	0.0603729	0.294653	0.103511	11.5454	3.11012	0.526189	0.80333	1.66326	20.9317	5.88526	3.33508	0.99859	1.77906	14.6463	11.5317	2.72703	0.984296	14.0513
37	Mt. Pollino, Italy	4.18112	0.490311	0.0762267	0.412335	0.21755	8.71418	3.87917	0.670858	0.675678	1.82601	18.377	6.64376	3.76164	1.23028	2.41565	16.7845	11.498	2.95243	1.614	13.5794
38	Mt. Pollino, Italy	3.10617	0.65403	0.0870583	0.124974	0.2715	10.3722	3.58344	0.83547	0.51485	1.69237	17.4003	5.80372	3.4832	0.827225	2.26377	17.4029	15.2229	2.80755	1.46709	12.0792
39	Mt. Pollino, Italy	4.52885	1.60044	0.0630608	0.151282	0.348604	11.0808	4.03434	0.83308	0.372874	1.53061	18.9934	7.66296	2.90046	0.502855	1.74561	15.2554	16.0687	3.00039	0.720847	8.60551
40	Mt. Pollino, Italy	6.14887	0.406344	0.104206	0.224845	0.215224	11.3502	3.81714	0.72578	0.575124	1.65942	21.1795	7.61694	4.03338	0.527781	1.59806	13.5184	12.0464	2.79264	0.615016	10.8447
41	Mt. Pollino, Italy	6.45208	0.527167	0.0641263	0.366497	0.196064	10.8711	3.50908	0.572681	0.847735	1.72411	19.5302	7.22199	3.17162	0.919081	2.06944	13.9553	13.7268	3.16196	0.996323	10.1166
42	Mt. Pollino, Italy	4.67094	0.666696	0.0854971	0.222907	0.343222	11.8848	4.49913	0.989389	0.697056	1.81593	18.0112	6.76506	3.72061	0.5861	1.97864	13.3414	14.85	3.30588	0.731158	10.8344
43	Mt. Pollino, Italy	3.13552	0.461671	0.109434	0.142574	0.2224	9.66002	4.51906	0.988591	0.383192	2.26273	16.0853	5.55118	5.84844	0.569984	2.8417	14.753	12.5239	3.91257	1.0816	14.9472
44	Mt. Pollino, Italy	6.30579	0.522389	0.0714178	0.121128	0.173399	9.88924	3.42576	0.654824	0.526826	1.8664	17.3494	4.73661	3.74975	0.603435	2.74809	17.2855	12.1614	2.99209	1.05915	13.7573
45	Chilean Andes	6.04324	0.57137	0.047005	0.246813	0.145952	12.1315	2.9423	0.598611	0.519132	1.52226	22.2661	6.19197	3.40569	0.653886	1.14336	14.1549	9.95614	2.20371	0.908742	14.3474
46	Chilean Andes	5.54169	1.02731	0.0531138	0.250029	0.142322	14.7709	3.10198	0.559407	0.553522	1.36148	24.7944	5.84587	2.73079	0.544619	1.03968	12.6193	9.70598	2.14954	0.612425	12.5956
47	Chilean Andes	6.46518	1.32337	0.0123726	0.23428	0.0775257	16.8011	1.99322	0.312645	0.500205	1.69057	22.8679	5.05094	2.10184	0.548997	0.906134	12.8475	9.99078	2.17243	0.519305	13.5836
48	Chilean Andes	5.58885	0.582226	0.0698705	0.211558	0.239116	12.836	3.92683	1.1991	0.441636	1.765	21.0947	5.86203	3.45385	0.728826	1.31589	14.5669	11.3382	2.2777	0.786974	11.7148
49	Chilean Andes	6.15338	1.21402	0.048149	0.231507	0.17934	12.6115	2.75549	0.594149	0.793824	2.07616	16.1066	7.04517	3.47413	0.89679	1.39937	16.0053	12.587	2.91698	0.761964	12.1493
50	Chilean Andes	4.2349	1.21981	0.0384574	0.24665	0.0736394	15.2176	1.5489	6.87841	0.670266	1.65961	23.3358	4.25971	2.22577	0.458896	0.457957	11.1255	8.72495	1.90353	0.998711	14.7209
51	Chilean Andes	4.42841	0.900914	0.0438911	0.253818	0.102379	14.9731	1.93077	0.311605	0.611239	1.61581	24.8582	5.17981	2.81621	0.439434	0.898455	13.1719	8.48783	2.52225	0.809101	15.6448
52	Chilean Andes	5.01914	0.553611	0.0448309	0.194097	0.156763	13.0243	3.18583	0.513567	0.644769	1.69779	23.001	6.27495	3.06656	0.538117	1.33922	15.2173	12.1152	2.58731	0.635271	10.1904
53	Chilean Andes	6.9074	0.7953	0.0453041	0.280498	0.189276	13.9809	2.057	0.321111	0.514355	1.22233	25.7602	5.07461	2.55404	0.493243	0.717757	12.7541	8.07124	1.91175	0.710925	15.6387
54	Chilean Andes	6.78392	0.469419	0.0732943	0.180948	0.268435	10.6425	4.07058	0.980641	0.666344	1.85876	17.9371	6.58	3.43426	0.736104	2.33368	14.334	14.7908	3.54573	0.833615	9.47984

## Sheet: Table 2. brGDGTs
Sup. Table 2.	Relative abundances (%) of the brGDGTs (with separation of the 5- and 6-methyl isomers) from the Peruvian Andes, Chilean Andes, Mts. Pollino and Shegyla.
Samples	Localisation	IIIa	IIIa'	IIIb	IIIb'	IIIc	IIIc'	IIa	IIa'	IIb	IIb'	IIc	IIc'	Ia	Ib	Ic
1	Peruvian Andes	0.210373	0.234633	n.d	n.d	n.d	n.d	2.83914	3.10056	0.386711	0.926766	0.157327	n.d	81.5022	8.08182	2.56051
2	Peruvian Andes	0.110588	0.085412	n.d	n.d	n.d	n.d	2.20765	0.160471	0.133883	0	0.136	n.d	94.8678	1.36612	0.93212
3	Peruvian Andes	0.0762021	0.0164815	n.d	n.d	n.d	n.d	2.14159	0.278894	0.0756761	0.0367272	0.0712837	n.d	93.56	2.4147	1.32847
4	Peruvian Andes	0.373542	0.12386	0.0233317	0.0359507	0.128743	n.d	8.26589	1.13759	0.344336	0.0731723	0.160736	n.d	84.7096	3.39152	1.23177
5	Peruvian Andes	0.349636	0.0944143	n.d	n.d	n.d	0.0200216	7.19233	0.748186	0.256987	0.044725	0.147633	n.d	87.1084	2.67628	1.36135
6	Peruvian Andes	0.147155	0.0248914	n.d	n.d	n.d	n.d	4.10542	0.387434	0.10316	0.0364194	0.0534754	0.0137986	92.1966	1.71346	1.21821
7	Peruvian Andes	0.160317	0.0353912	n.d	n.d	n.d	n.d	4.65654	0.406388	0.189952	0.0453732	0.0900437	n.d	90.6204	2.299	1.49665
8	Peruvian Andes	1.76531	0.319522	n.d	n.d	n.d	0.015035	22.4571	1.475	1.09337	0.152508	0.467873	n.d	68.4936	2.20866	1.55201
9	Peruvian Andes	0.81547	0.205072	n.d	n.d	n.d	0.0114506	14.6715	1.20885	0.633278	0.0785028	0.264556	n.d	78.3657	1.93649	1.80912
10	Peruvian Andes	0.389834	0.394908	0.0130312	0.0104283	n.d	n.d	14.6134	1.5558	0.939942	0.125717	0.464604	0.125588	74.9603	3.07694	3.32951
11	Peruvian Andes	1.49833	0.254022	n.d	n.d	n.d	n.d	25.4934	1.25389	1.29558	0.164565	0.584773	0.0699563	66.0267	2.05179	1.30703
12	Peruvian Andes	0.619346	0.151538	n.d	n.d	n.d	n.d	16.5844	1.01293	0.505257	0.07301	0.216655	n.d	77.8799	2.10211	0.854858
13	Peruvian Andes	0.370092	0.379036	n.d	n.d	n.d	n.d	26.0655	1.44287	1.5018	0.144492	0.540261	0.107996	65.263	2.54243	1.64256
14	Peruvian Andes	5.58005	0.211253	0.033436	0.0293489	n.d	n.d	33.7693	3.0228	0.772271	0.0830811	0.219996	n.d	51.8854	2.1513	2.24181
15	Mt. Shegyla, Tibet	3.57152	1.10073	n.d	n.d	n.d	n.d	31.3867	9.82475	1.09135	0.691363	n.d	n.d	47.9115	3.75482	0.667271
16	Mt. Shegyla, Tibet	4.97666	4.82965	0.215256	0.473171	n.d	n.d	23.4326	17.8487	2.95136	3.43706	n.d	n.d	33.8804	6.58192	1.37322
17	Mt. Shegyla, Tibet	3.94957	3.27581	n.d	n.d	n.d	n.d	23.6862	16.2185	2.84915	2.73871	n.d	n.d	40.7802	5.45841	1.04349
18	Mt. Shegyla, Tibet	8.6122	1.48396	n.d	n.d	n.d	n.d	31.941	10.5313	2.00317	0.434794	0.489455	n.d	36.7356	3.86629	3.90226
19	Mt. Shegyla, Tibet	11.156	4.40383	0.126045	0.232933	n.d	n.d	27.5066	19.3503	1.78567	2.06318	0.470252	0.174789	28.4049	3.53155	0.793914
20	Mt. Shegyla, Tibet	12.6998	2.53979	n.d	n.d	n.d	n.d	34.7202	11.4929	1.41175	1.07711	0.523718	0.1051	31.9321	2.86664	0.630889
21	Mt. Shegyla, Tibet	7.50467	0.407018	n.d	n.d	n.d	n.d	38.9753	6.12672	0.70587	0.18588	n.d	n.d	44.2229	1.42964	0.441957
22	Mt. Shegyla, Tibet	6.01773	0.425603	n.d	n.d	n.d	n.d	37.8196	5.04727	0.881019	0.205641	0.512257	0.0530277	46.84	1.73881	0.459006
23	Mt. Shegyla, Tibet	14.1041	0.543608	n.d	n.d	n.d	n.d	38.2322	3.59148	0.562476	0.103192	0.46054	n.d	41.4927	0.732404	0.177286
24	Mt. Shegyla, Tibet	17.3227	n.d	n.d	n.d	n.d	n.d	41.7807	n.d	0.144572	0.162444	0.4708	n.d	38.9675	0.915234	0.236048
25	Mt. Shegyla, Tibet	13.6621	n.d	n.d	n.d	n.d	n.d	40.3053	n.d	0.181668	0.259509	0.506283	0.0609241	43.7935	0.975519	0.255217
26	Mt. Shegyla, Tibet	12.5934	n.d	n.d	n.d	n.d	n.d	41.6535	n.d	0.128812	0.199991	0.389724	0.329941	42.7745	1.56939	0.360735
27	Mt. Shegyla, Tibet	13.846	0.638567	0.164778	0.16235	n.d	n.d	39.4902	5.56543	0.118826	0.337591	0.364356	0.396665	36.4532	1.97116	0.490846
28	Mt. Shegyla, Tibet	12.0083	0.470444	0.0706518	n.d	n.d	n.d	38.2323	5.39274	0.146743	0.218928	0.456025	0.219207	40.8305	1.65801	0.296034
29	Mt. Shegyla, Tibet	18.7411	0.559952	n.d	n.d	n.d	n.d	42.3935	3.73596	0.935997	n.d	0.418794	0.243047	30.9474	1.64487	0.379323
30	Mt. Shegyla, Tibet	19.1923	1.54514	n.d	n.d	n.d	n.d	36.7321	10.1355	0.723974	0.363456	0.399617	n.d	29.4052	1.17798	0.324783
31	Mt. Shegyla, Tibet	22.2958	0.630975	n.d	n.d	n.d	n.d	40.9392	5.47208	0.382252	0.189719	0.171746	n.d	29.2542	0.454781	0.209236
32	Mt. Pollino, Italy	7.68193	20.9327	0.992635	n.d	n.d	n.d	9.68087	35.2861	0.980748	6.31423	n.d	n.d	13.5795	3.8475	0.703761
33	Mt. Pollino, Italy	4.1202	17.0627	1.52716	n.d	n.d	n.d	7.6537	35.8099	1.6051	9.40877	n.d	n.d	16.6439	6.16847	n.d
34	Mt. Pollino, Italy	4.49636	16.7308	0.481421	1.77398	n.d	n.d	8.11175	30.2603	3.45602	11.9071	0.134169	0.278827	14.5611	7.31286	0.495321
35	Mt. Pollino, Italy	3.88645	19.1706	0.690866	1.68711	n.d	n.d	9.04445	29.0247	2.87594	14.0094	n.d	n.d	11.1901	7.30434	1.11607
36	Mt. Pollino, Italy	7.7467	6.38039	0.210857	0.233108	0.208272	0.15946	22.7558	25.6597	1.03492	2.32388	0.164782	n.d	29.9062	2.95975	0.256221
37	Mt. Pollino, Italy	5.66861	9.83292	0.42227	1.06638	n.d	n.d	15.823	24.4635	8.08631	7.2952	n.d	n.d	15.1459	8.88232	3.31359
38	Mt. Pollino, Italy	2.47931	24.3395	0.502957	1.59764	0.361264	n.d	9.53298	33.662	2.22092	7.49748	0.0715323	0.146432	13.0281	4.55984	n.d
39	Mt. Pollino, Italy	3.81886	23.3715	0.278228	1.40517	n.d	n.d	10.4133	30.8462	2.03529	9.85525	0.108085	0.254761	12.2578	5.07896	0.276554
40	Mt. Pollino, Italy	10.5788	7.83322	0.218949	0.151653	0.0984162	0.17816	20.4109	27.5259	3.35596	1.96232	0.32514	0.0746682	22.0588	3.6927	1.53448
41	Mt. Pollino, Italy	10.4928	10.0545	0.475501	0.299948	n.d	n.d	19.2718	29.8234	1.50406	2.97867	n.d	n.d	21.6729	3.12435	0.302073
42	Mt. Pollino, Italy	5.81084	21.7688	0.369022	1.03511	n.d	n.d	6.92915	31.7078	2.40183	10.0533	0.0844721	0.180949	13.0146	6.18788	0.456245
43	Mt. Pollino, Italy	7.97448	19.608	0.37261	1.96438	n.d	n.d	8.81114	27.1379	4.94423	12.9821	0.160769	0.480998	9.22958	5.61241	0.721353
44	Mt. Pollino, Italy	7.5969	16.4666	1.44064	1.18736	0.113681	0.140512	9.3096	25.7518	5.63441	10.1966	0.834984	0.367875	9.69398	7.74624	3.51891
45	Chilean Andes	18.4012	1.88797	n.d	n.d	n.d	n.d	34.1905	4.26289	1.78173	1.78132	0.0801879	0.00794756	29.7543	2.76657	5.08543
46	Chilean Andes	7.44192	4.34681	n.d	n.d	n.d	n.d	31.6858	15.682	0.825266	2.09272	0.0757457	0.0261285	34.3632	3.33692	0.123514
47	Chilean Andes	9.88647	1.52436	n.d	n.d	n.d	n.d	39.8155	8.0569	0.149964	0.602214	0.089846	0.0195348	38.4652	1.39009	n.d
48	Chilean Andes	n.d	n.d	n.d	n.d	n.d	n.d	n.d	n.d	n.d	n.d	n.d	n.d	n.d	n.d	n.d
49	Chilean Andes	10.4841	2.58285	n.d	n.d	n.d	n.d	33.2512	13.9	0.331668	1.00777	0.0858723	0.00784402	36.913	1.33316	0.102579
50	Chilean Andes	13.8028	0.876797	n.d	n.d	n.d	n.d	43.6487	0.391911	0.373812	0.150904	0.0351497	0.00863652	40.1766	0.534695	n.d
51	Chilean Andes	14.0941	1.39545	n.d	n.d	n.d	n.d	39.4681	6.4779	0.310294	0.0243449	n.d	n.d	36.9292	0.623044	0.677519
52	Chilean Andes	10.9598	7.28422	n.d	n.d	n.d	n.d	25.2296	20.5527	3.57315	1.87698	n.d	n.d	26.2461	3.92215	0.355349
53	Chilean Andes	12.9369	5.31704	n.d	n.d	n.d	n.d	26.5788	20.5991	1.66176	1.39511	n.d	n.d	29.814	1.69729	n.d
54	Chilean Andes	14.1364	0.28412	n.d	n.d	n.d	n.d	44.5387	0.235325	n.d	n.d	n.d	n.d	40.8055	n.d	n.d

## Sheet: Table 3. Regression
Sup. Table 3.	Characteristics of the linear regressions (R², RMSE, p-value, equation) between pH and RIAN/CBT; MAAT and MBT'5Me/RAN15/RAN17 for the different altitudinal transect investigated.
RIAN		Site	Study	R²	p-value	RMSE	Equation				MBT'5Me		Site	Study	R²	p-value	RMSE	Equation
		Peruvian Andes	Present study	0.04	4.70 × 10-1	None	None						Peruvian Andes	Present study	0.68*	2.77 × 10-4	3.74	MAAT = 42.5 × MBT'5Me - 21.4
		Chilean Andes	Present study	0.66*	4.24 × 10-3	0.42	pH = -5.50 × RIAN + 7.59						Chilean Andes	Present study	0.24	2.21 × 10-1	None	None
		Mt. Majella	Huguet et al., 2019	0.15	2.64 × 10-1	None	None						Mt. Majella	Huguet et al., 2019	0.75*	5.47 × 10-4	2.34	MAAT = 59.2 × MBT'5Me - 24.6
		Mt. Pollino	Present study	0.29	5.60 × 10-2	None	None						Mt. Pollino	Present study	0.34*	3.50 × 10-2	3.14	MAAT = 35.2 × MBT'5Me -5.89
		Mt. Rungwe	Huguet et al., 2019	0.11	8.34 × 10-2	None	None						Mt. Shegyla	Present study	0.58*	3.78 × 10-4	1.97	MAAT = 26.9 × MBT'5Me - 7.70
		Mt. Shegyla	Present study	0.46*	2.84 × 10-3	0.4	pH = -3.77 × RIAN + 6.98						Mt. Shennongjia	Wang et al., 2016	0.89*	4.51 × 10-13	1.55	MAAT = 34.7 × MBT'5Me -13
		Mt. Shennongjia	Wang et al., 2016	0.71*	7.40 × 10-8	0.54	pH = -6.79 × RIAN + 9.37						Mts. Lautaret-Bauges	Vequaud et al., 2021	0.35*	8.19 × 10-6	3.29	MAAT = 24.4 × MBT'5Me -4.78
		Mts. Lautaret-Bauges	Vequaud et al., 2021	0.43*	3.06 × 10-7	0.83	pH = -6.59 × RIAN + 8.04						Global	Present study	0.57*	5.86 × 10-27	3.39	MAAT = 24.3 × MBT'5Me -5.03
		Global	Present study	0.34*	7.39 × 10-17	0.99	pH = -5.40 × RIAN + 7.86
											CBT'		Site	Study	R²	p-value	RMSE	Equation
RAN15		Site	Study	R²	p-value	RMSE	Equation						Peruvian Andes	Present study	0.18	1.33 × 10-1	None	None
		Peruvian Andes	Present study	0.71*	1.52 × 10-4	3.57	MAAT = -1.73 × RAN15 + 26.5						Chilean Andes	Present study	0.89*	1.01 × 10-2	0.27	pH = 0.74 × CBT' + 5.98
		Chilean Andes	Present study	0.03	7.07 × 10-1	None	None						Mt. Majella	Huguet et al., 2019	0.18	1.92 × 10-1	None	None
		Mt. Majella	Huguet et al., 2019	0.49*	3.33 × 10-2	3.34	MAAT = -1.92 × RAN15 + 13.6						Mt. Pollino	Present study	0.69*	3.91 × 10-4	0.37	pH = 2.29 × CBT' + 5.18
		Mt. Pollino	Present study	0.54*	4.39 × 10-3	2.64	MAAT = -1.21 × RAN15 + 18						Mt. Shegyla	Present study	0.50*	1.42 × 10-3	0.38	pH = 0.61 × CBT' + 6.01
		Mt. Rungwe	Huguet et al., 2019	0.79*	2.14 × 10-10	2.13	MAAT = -3.81 × RAN15 + 29.7						Mt. Shennongjia	Wang et al., 2016	0.84*	6.98 × 10-11	0.41	pH = 1.91 × CBT' + 6.99
		Mt. Shegyla	Present study	0.57*	4.33 × 10-4	1.98	MAAT = -0.86 × RAN15 + 11.1						Mts. Lautaret-Bauges	Vequaud et al., 2021	0.76*	5.71 × 10-16	0.51	pH = 1.72 × CBT' + 6.55
		Mt. Shennongjia	Wang et al., 2016	0.53*	2.67 × 10-5	2.63	MAAT = -1.60 × RAN15 + 16.3						Global	Present study	0.68*	1.94 × 10-35	0.71	pH = 1.43 × CBT' + 6.47
		Mts. Lautaret-Bauges	Vequaud et al., 2021	0	7.31 × 10-1	None	None
		Global	Present study	0.37*	4.75 × 10-18	5.46	MAAT = -1.55 × RAN15 + 18.3
RAN17		Site	Study	R²		RMSE	Equation
		Peruvian Andes	Present study	0.81*	1.03 × 10-5	2.87	MAAT = -9.61 × RAN17 + 29
		Chilean Andes	Present study	0.04	6.4 × 10-1	None	None
		Mt. Majella	Huguet et al., 2019	0.27	1.03 × 10-1	None	None
		Mt. Pollino	Present study	0.56*	3.22 × 10-3	2.57	MAAT = -2.43 × RAN17 + 18.9
		Mt. Rungwe	Huguet et al., 2019	0.53*	3.18× 10-6	3.19	MAAT = -9.86 × RAN17 + 29.3
		Mt. Shegyla	Present study	0.54*	8.42 × 10-4	2.07	MAAT = -3.11 × RAN17 + 13.1
		Mt. Shennongjia	Wang et al., 2016	0.49*	5.52 × 10-5	2.71	MAAT = -4.68 × RAN17 + 18
		Mts. Lautaret-Bauges	Vequaud et al., 2021	0	4.05 × 10-1	None	None
		Global	Present study	0.41*	4.75 × 10-18	5.28	MAAT = -3.49 × RAN17 + 18.1
