# Supplementary material for: Development of global temperature and pH calibrations based on bacterial 3-hydroxy fatty acids in soils
Source: Copernicus journal article supplement (doi:10.5194/bg-18-3937-2021), 2021-07-01
Supplement: Supplementary file 1 [file bg-18-3937-2021-supplement.zip]

Archive with 3 entries (3 files):
- bg-18-3937-2021-supplement-title-page.pdf
- 4_Supplementary tables.xlsx
- 4_Supplementary figures.pdf
