# Supplementary material for: Development of global temperature and pH calibrations based on bacterial 3-hydroxy fatty acids in soils
Source: Copernicus journal article supplement (doi:10.5194/bg-18-3937-2021), 2021-07-01
Supplement: Supplementary file 1 [file bg-18-3937-2021-supplement.zip › 4_Supplementary figures.pdf]

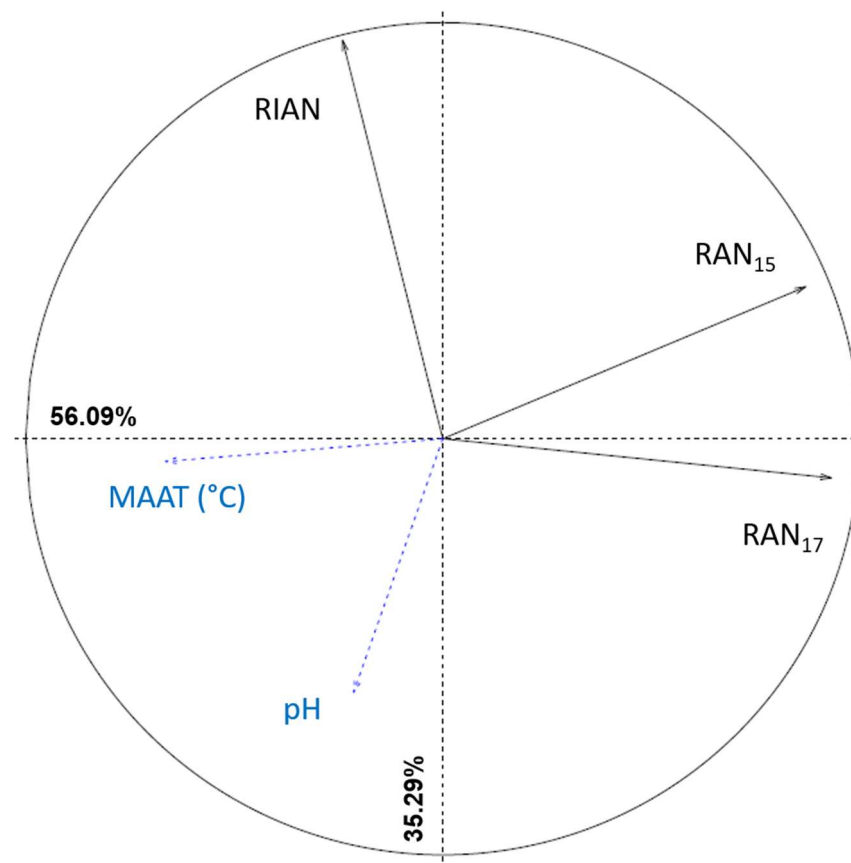

**Supplementary Figure 1.** PCA between pH, MAAT and 3-OH FA-derived proxies (RAN<sub>15</sub>, RAN<sub>17</sub>, RIAN) along Mts Rungwe, Pollino, Majella, Shegyla, Shennongjia, Lautaret-Galibier Peruvian Andes and Chilean Andes.

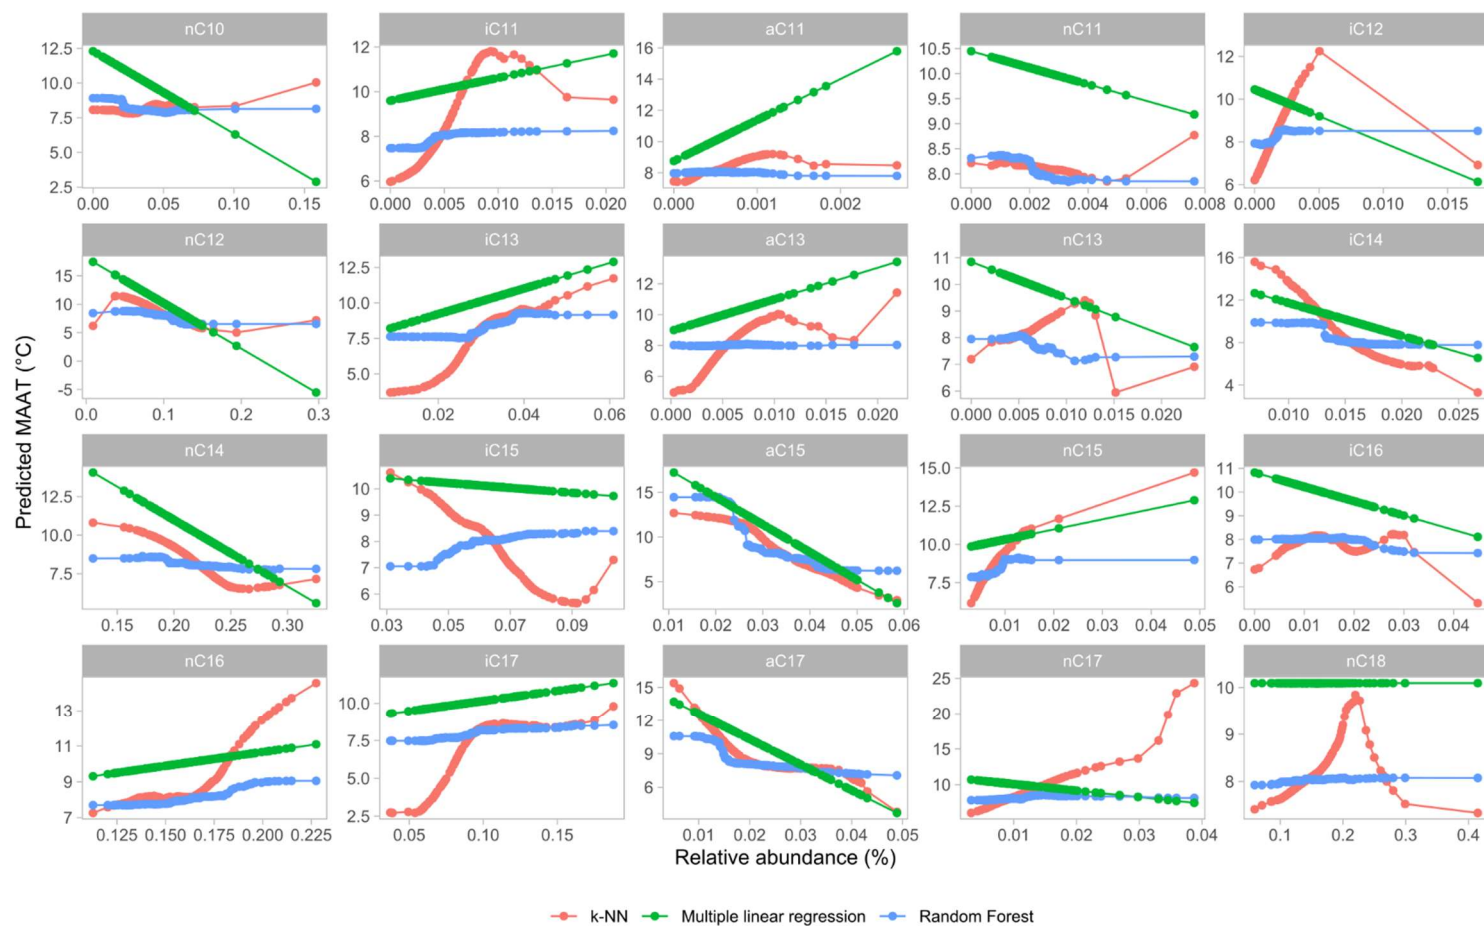

**Supplementary Figure 2.** Partial plots of the individual 3-OH FA variations in multiple regression, random forest and k-NN models proposed to estimate MAAT.

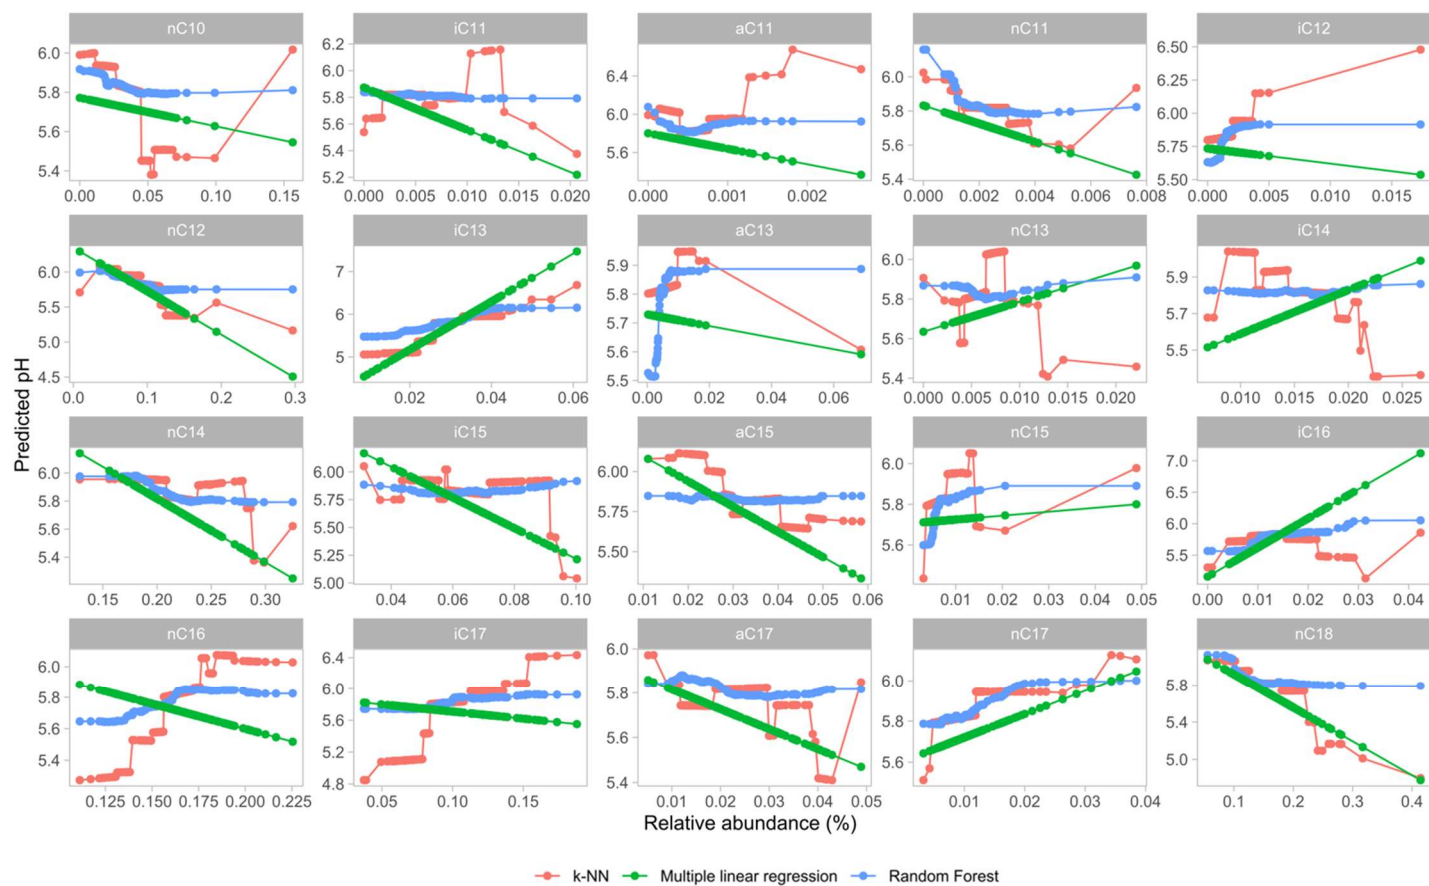

**Supplementary Figure 3.** Partial plots of the individual 3-OH FA variations in multiple regression, random forest and k-NN models proposed to estimate pH .

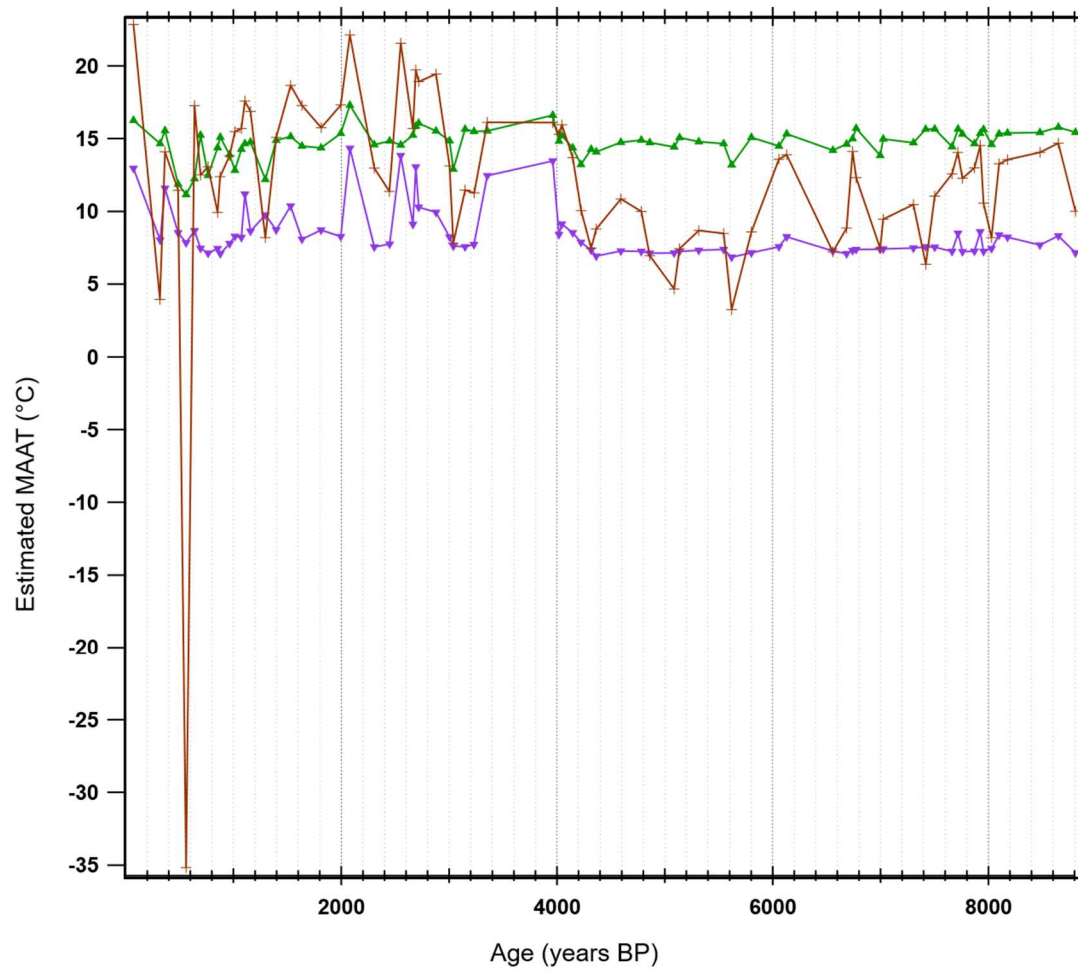

**Supplementary Figure 4.** Application of the three MAAT models proposed in this study and applied to the HS4 speleothem: random forest calibration (green); k-NN calibration (purple); multiple linear regression (brown).
