# Supplementary material for: Development of global temperature and pH calibrations based on bacterial 3-hydroxy fatty acids in soils
Source: Copernicus journal article supplement (doi:10.5194/bg-18-3937-2021), 2021-07-01
Supplement: Supplementary file 1 [file bg-18-3937-2021-supplement.zip › bg-18-3937-2021-supplement-title-page.pdf]

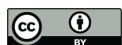

## *Supplement of*

# **Development of global temperature and pH calibrations based on bacterial 3-hydroxy fatty acids in soils**

**Pierre Véquaud et al.**

*Correspondence to:* Arnaud Huguet ([arnaud.huguet@sorbonne-universite.fr](mailto:arnaud.huguet@sorbonne-universite.fr))

- [bg-18-3937-2021-supplement-title-page.pdf](#)
- [4\\_Supplementary figures.pdf](#)
- [4\\_Supplementary tables.xlsx](#)

The copyright of individual parts of the supplement might differ from the article licence.
